# Supplementary material for: The planar cell polarity gene Vangl2 is required for mammalian kidney-branching morphogenesis and glomerular maturation
Source: PubMed Central journal article supplement — Hum Mol Genet. 2010 Sep 14;19(23):4663–76. doi: 10.1093/hmg/ddq397 (PMC2972698; doi:10.1093/hmg/ddq397), 2010-09-14
Supplement: supp_ddq397_ddq397supp.pdf [file supp_ddq397_ddq397supp.pdf]

## Supplemental Figure 1

Table One

| Encoded Molecule                                                                                           | Transcript symbol | NCBI RefSeq  |
|------------------------------------------------------------------------------------------------------------|-------------------|--------------|
| <b><i>Growth factors, transcription factors and adhesion molecules expressed in normal metanephroi</i></b> |                   |              |
| Actin, $\alpha 2$ , smooth muscle, aorta                                                                   | <i>Acta2</i>      | NM_007392    |
| Amphiregulin (Areg)                                                                                        | <i>Areg</i>       | NM_009704    |
| Angiotensin II receptor, type 1a                                                                           | <i>Agtr1a</i>     | NM_177322    |
| Angiotensin II receptor, type 1b                                                                           | <i>Agtr1b</i>     | NM_175086    |
| Angiotensin II receptor, type 2                                                                            | <i>Agtr2</i>      | NM_007429    |
| B-cell leukemia/lymphoma 2, transcript variant 1                                                           | <i>Bcl2</i>       | NM_009741    |
| Bone morphogenetic protein 4                                                                               | <i>Bmp4</i>       | NM_007554    |
| Bone morphogenetic protein 7                                                                               | <i>Bmp7</i>       | NM_007557    |
| Catenin (cadherin associated protein), $\beta 1$                                                           | <i>Ctnnb1</i>     | NM_007614    |
| Epidermal growth factor                                                                                    | <i>Egf</i>        | NM_010113    |
| Epidermal growth factor receptor (Egfr), complete cds                                                      | <i>Egfr</i>       | AF_275367    |
| Eyes absent 1 homolog (Drosophila)                                                                         | <i>Eya1</i>       | NM_010164    |
| Fibroblast growth factor 2                                                                                 | <i>Fgf2</i>       | NM_008006    |
| Fibroblast growth factor 7                                                                                 | <i>Fgf7</i>       | NM_008008    |
| Forkhead box D1                                                                                            | <i>Foxd1</i>      | NM_008242    |
| Fraser syndrome 1 homolog (human)                                                                          | <i>Fras1</i>      | NM_175473    |
| Fras1 related extracellular matrix protein 1                                                               | <i>Frem1</i>      | NM_177863    |
| Fras1 related extracellular matrix protein 2                                                               | <i>Frem2</i>      | NM_172862    |
| Fras1 related extracellular matrix protein 3                                                               | <i>Frem3</i>      | XM_984073    |
| Glial cell line derived neurotrophic factor                                                                | <i>Gdnf</i>       | NM_010275    |
| Glutamate receptor interacting protein 1                                                                   | <i>Grip1</i>      | NM_133442    |
| Growth differentiation factor 11                                                                           | <i>Gdf11</i>      | NM_010272    |
| Hepatocyte growth factor                                                                                   | <i>Hgf</i>        | NM_010427    |
| Homeo box A11                                                                                              | <i>Hoxa11</i>     | NM_010450    |
| Homeo box D11                                                                                              | <i>Hoxd11</i>     | NM_008273    |
| Indian hedgehog                                                                                            | <i>Ihh</i>        | NM_010544    |
| Integrin alpha 8                                                                                           | <i>Itga8</i>      | NM_001001309 |
| Met proto-oncogene                                                                                         | <i>Met</i>        | NM_008591    |
| Mouse mRNA for retinoic acid receptor, $\gamma$                                                            | <i>Rarg</i>       | X15848       |
| Murine mRNA for leukaemia inhibitory factor (LIF)                                                          | <i>Lif</i>        | X06381       |
| Nestin                                                                                                     | <i>Nes</i>        | NM_016701    |
| Paired box gene 2                                                                                          | <i>Pax2</i>       | NM_011037    |
| Paired box gene 8                                                                                          | <i>Pax8</i>       | NM_011040    |
| Patched homolog 1                                                                                          | <i>Ptch1</i>      | NM_008957    |

|                                                                                              |               |              |
|----------------------------------------------------------------------------------------------|---------------|--------------|
| Ret proto-oncogene, complete cds                                                             | <i>Ret</i>    | AF209436     |
| Retinoic acid receptor, alpha                                                                | <i>Rara</i>   | NM_009024    |
| Retinoic acid receptor, $\beta$                                                              | <i>Rarb</i>   | NM_011243    |
| Sal-like 1 (Drosophila)                                                                      | <i>Sall1</i>  | NM_021390    |
| Sine oculis-related homeobox 1 homolog (Drosophila)                                          | <i>Six1</i>   | NM_009189    |
| Sine oculis-related homeobox 2 homolog (Drosophila)                                          | <i>Six2</i>   | NM_011380    |
| Sonic hedgehog                                                                               | <i>Shh</i>    | NM_009170    |
| Snail homolog 1 (Drosophila)                                                                 | <i>Snai1</i>  | NM_011427    |
| Snail homolog 2 (Drosophila)                                                                 | <i>Snai2</i>  | NM_011415    |
| T-box 1 (Tbx1)                                                                               | <i>Tbx1</i>   | NM_011532    |
| T-box18                                                                                      | <i>Tbx18</i>  | NM_023814    |
| Teashirt zinc finger family member 1                                                         | <i>Tshz1</i>  | NM_001081300 |
| Teashirt zinc finger family member 2                                                         | <i>Tshz2</i>  | NM_080455    |
| Teashirt zinc finger family member 3                                                         | <i>Tshz3</i>  | NM_172298    |
| Transforming growth factor- $\alpha$                                                         | <i>Tgfa</i>   | NM_031199    |
| Transforming growth factor- $\beta$ 1                                                        | <i>Tgfb1</i>  | NM_011577    |
| Wilms tumor homolog                                                                          | <i>Wt1</i>    | NM_144783    |
| Wingless-related MMTV integration site 4                                                     | <i>Wnt4</i>   | NM_009523    |
| Wingless-related MMTV integration site 11                                                    | <i>Wnt11</i>  | NM_009519    |
| <b><i>Molecules, often located in primary cilia, which prevent cyst formation</i></b>        |               |              |
| Bardet-Biedl syndrome 1 homolog (human)                                                      | <i>Bbs1</i>   | NM_001033128 |
| Bardet-Biedl syndrome 4 homolog (human)                                                      | <i>Bbs4</i>   | NM_175325    |
| Cystin 1, transcript variant 1                                                               | <i>Cys1</i>   | NM_138686    |
| Intraflagellar transport 88 homolog (Chlamydomonas) (polaris)                                | <i>Ift88</i>  | NM_009376    |
| Inversin                                                                                     | <i>Invs</i>   | NM_010569    |
| Lectin, galactose binding, soluble 3                                                         | <i>Lgals3</i> | NM_010705    |
| Meckel syndrome, type 1                                                                      | <i>Mks1</i>   | NM_001039684 |
| Oral-facial-digital syndrome 1 gene homolog (human)                                          | <i>Ofd1</i>   | NM_177429    |
| Polycystic kidney disease 1 homolog                                                          | <i>Pkd1</i>   | NM_013630    |
| Polycystic kidney disease 2                                                                  | <i>Pkd2</i>   | NM_008861    |
| Polycystic kidney and hepatic disease 1                                                      | <i>Pkhd1</i>  | NM_153179    |
| Transcription factor 2                                                                       | <i>Tcf2</i>   | NM_009330    |
| Transmembrane protein 67 (Meckel Syndrome Type 3)                                            | <i>Tmem67</i> | NM_177861    |
| <b><i>Segment-specific markers of renal tubules and sodium-potassium ATPase subunits</i></b> |               |              |
| Aquaporin 2                                                                                  | <i>Aqp2</i>   | NM_009699    |
| Bcl2-associated X protein                                                                    | <i>Bax</i>    | NM_007527    |
| Gamma-glutamyltransferase 1                                                                  | <i>Ggt1</i>   | NM_008116    |
| Mus musculus ATPase, Na <sup>+</sup> /K <sup>+</sup> transporting, alpha 1 polypeptide       | <i>Atp1a1</i> | NM_144900    |
| Mus musculus ATPase, Na <sup>+</sup> /K <sup>+</sup> transporting, beta 1 polypeptide        | <i>Atp1b1</i> | NM_009721    |

|                                                                                                                         |               |              |
|-------------------------------------------------------------------------------------------------------------------------|---------------|--------------|
| Nephrin 1 homolog, nephrin (human)                                                                                      | <i>Nphs1</i>  | NM_019459    |
| Nuclear receptor subfamily 3, group C, member 1 (GR)                                                                    | <i>Nr3c1</i>  | NM_008173    |
| Nuclear receptor subfamily 3, group C, member 2 (MR)                                                                    | <i>Nr3c2</i>  | NM_001083906 |
| Uromodulin                                                                                                              | <i>Umod</i>   | NM_009470    |
| <b><i>Transcripts previously found to be deregulated in metanephroi after exposure to maternal low protein diet</i></b> |               |              |
| Cadherin 11                                                                                                             | <i>Cdh11</i>  | NM_009866    |
| Calmodulin 1                                                                                                            | <i>Calml1</i> | NM_009790    |
| Cofilin 1, non-muscle                                                                                                   | <i>Cfl1</i>   | NM_007687    |
| Eukaryotic translation initiation factor 4, $\gamma 2$                                                                  | <i>Eif4g2</i> | NM_013507    |
| Kinectin 1                                                                                                              | <i>Ktn1</i>   | NM_008477    |
| Lactate dehydrogenase A                                                                                                 | <i>Ldha</i>   | NM_010699    |
| Nucleosome assembly protein 1-like 1                                                                                    | <i>Nap1l1</i> | NM_015781    |
| Prospero-related homeobox 1                                                                                             | <i>Prox1</i>  | NM_008937    |
| SMT3 suppressor of mif two 3 homolog 2 (yeast)                                                                          | <i>Sumo2</i>  | NM_133354    |
| Topoisomerase (DNA) II beta binding protein                                                                             | <i>Topbp1</i> | NM_176979    |
| Tubulin, $\alpha 1A$                                                                                                    | <i>Tuba1a</i> | NM_011653    |
| Tyrosine 3-monooxygenase/tryptophan 5-monooxygenase activation protein, theta polypeptide                               | <i>Ywhaq</i>  | NM_011739    |

**Table Two**

| <b>Encoded Molecule</b>     | <b>Transcript Symbol</b> | <b>NCBI RefSeq</b> | <b>P Value</b> | <b>Relative Change</b> |
|-----------------------------|--------------------------|--------------------|----------------|------------------------|
| Fibroblast growth factor 7  | Fgf7                     | NM_008008          | 0.0829         | 1.035                  |
| Sonic hedgehog              | Shh                      | NM_009170          | 0.2553         | 0.993                  |
| Intraflagellar transport 88 | Ift88                    | NM_009376.1        | 0.7997         | 0.84                   |
| Patched homolog 1           | Ptch1                    | NM_008957          | 0.7704         | 0.849                  |
